# Supplementary material
Source: publisher figshare collection journal article supplement (https://acs.figshare.com/ndownloader/files/3914761)
Supplement: Supplementary file 1 [file 3914761]

## Solvent Dependent Structures of Hydrogen-Bonded Organic Frameworks of 2,6-Diamino Purine

Peng Li,<sup>a</sup> Osamah Alduhaish,<sup>a</sup> Hadi D. Arman,<sup>a</sup> Hailong Wang,<sup>a</sup> Khalid Alfooty,<sup>b</sup> Banglin Chen<sup>a,b\*</sup>

<sup>a</sup>Department of Chemistry, University of Texas at San Antonio, One UTSA Circle, San Antonio, Texas 78249-0698, United States; Fax: (1)-210-458-7428; E-mail: [Banglin.Chen@utsa.edu](mailto:Banglin.Chen@utsa.edu)

<sup>b</sup>Department of Chemistry, Faculty of Science, King Abdulaziz University, Jeddah, Saudi Arabia

### 1. Characterizations

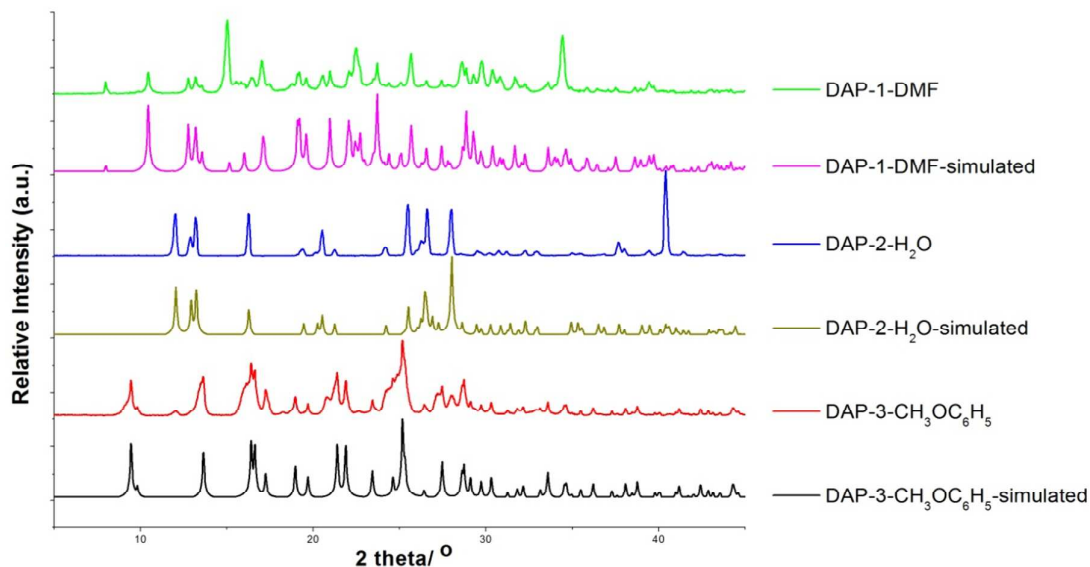

**Figure S1.** Powder X-ray diffraction patterns of simulated **DAP-1-DMF**, **DAP-2-H<sub>2</sub>O** and **DAP-3-CH<sub>3</sub>OC<sub>6</sub>H<sub>5</sub>** and as-synthesized ones.

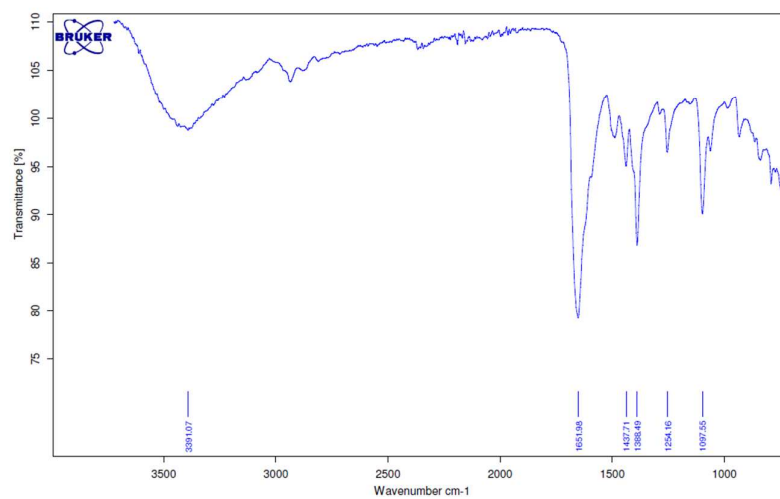

(a)

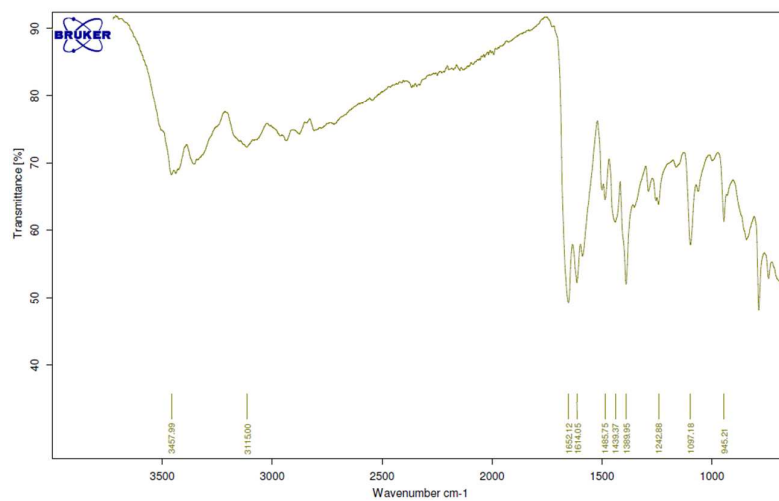

(b)

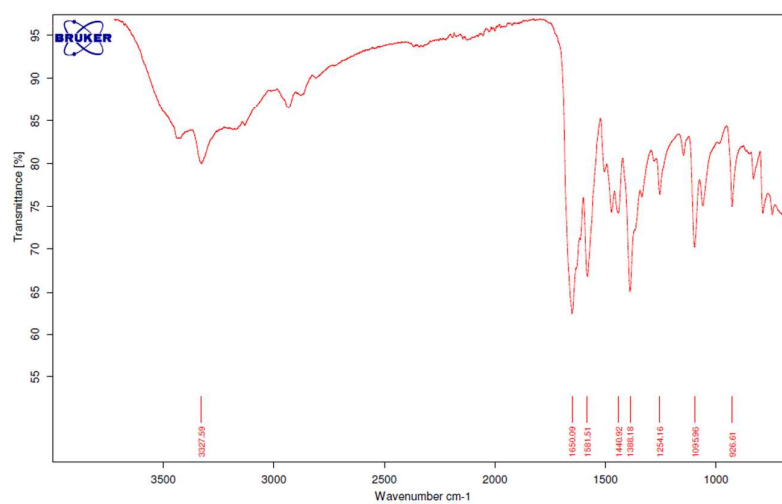

(c)

**Figure S2.** FT-IR patterns of **DAP-1-DMF**, **DAP-2-H<sub>2</sub>O** and **DAP-3-CH<sub>3</sub>OC<sub>6</sub>H<sub>5</sub>**.

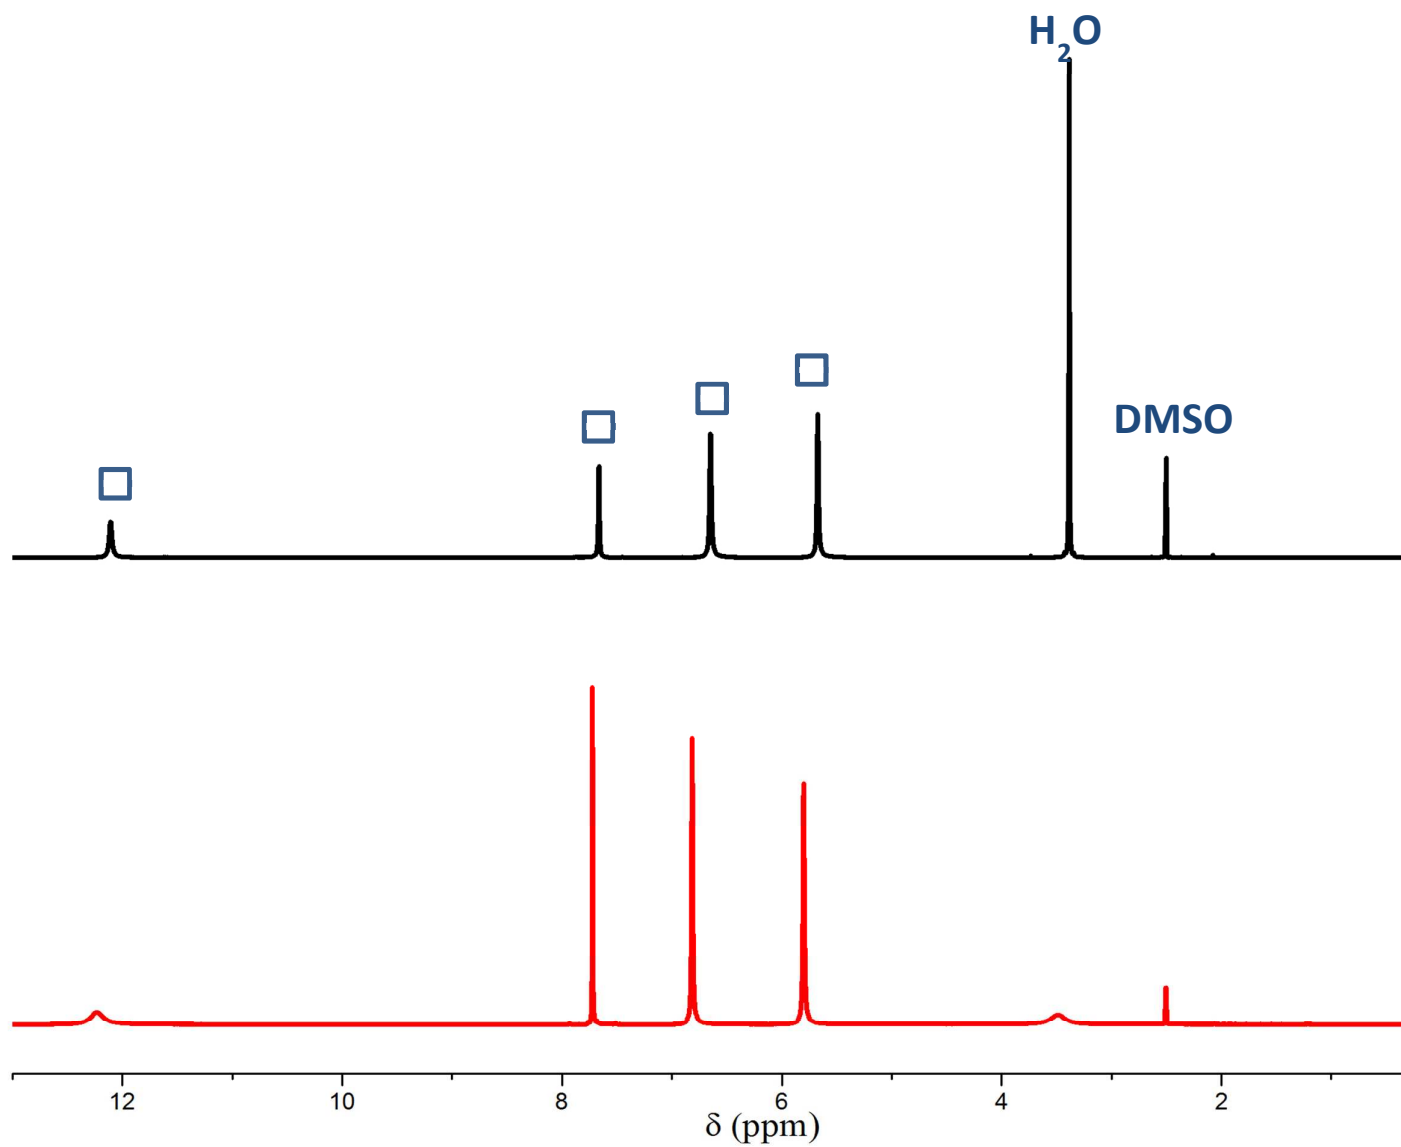

**Figure S3.**  $^1\text{H}$ NMR spectra of the **DAP-3-CH<sub>3</sub>OC<sub>6</sub>H<sub>5</sub>** and DAP without solvent digested in DMSO- $d_6$ . The labeled peaks (blue squares) represent DAP molecule.
